# Supplementary material for: MCMDA: Matrix completion for MiRNA-disease association prediction
Source: PubMed Central journal article supplement (PMC5400576; doi:10.18632/oncotarget.15061), 2017-02-03
Supplement: oncotarget-08-21187-s001.pdf [file oncotarget-08-21187-s001.pdf]

## **MCMDA: Matrix completion for MiRNA-disease association prediction**

### **SUPPLEMENTARY TABLE**

**Supplementary Table 1: We applied MCMDA to prioritize all the candidate miRNA-disease pairs based on all the known miRNA-disease associations in HMDD database as training samples. This prediction result is published for further experimental validation and research**

See Supplementary File 1
